# Supplementary material for: Designing an optimal HIV programme for South Africa: Does the optimal package change when diminishing returns are considered?
Source: Springer Nature journal article supplement (doi:10.1186/s12889-017-4023-3), 2017-01-31
Supplement: MOESM1 [file 12029956]

## Technical appendix

for the paper "Designing an optimal HIV programme for South Africa: Does the optimal package change when diminishing returns are considered?" by Calvin Chiu, Leigh F. Johnson, Lise Jamieson, Bruce A. Larson and Gesine Meyer-Rath

### A: Data sources and model assumptions regarding the selection of intervention-coverage options

For all epidemiological projections, we used a pre-existing, well-calibrated HIV transmission model that accounts for non-linear effects of scale up. The Thembisa model is a deterministic compartmental model of the South African HIV epidemic maintained by the Centre for Infectious Disease Epidemiology and Research at the University of Cape Town [1].

Coverage levels were specified by linearly interpolating between the baseline and feasible maximum coverage levels. Coverage levels below baseline (minimum coverage) were determined by extrapolating the above linear trend to below baseline levels. Baseline coverage levels were informed by model outputs on the status quo based on the epidemiological model's fitting process [1], apart from the three social behaviour change communication campaigns whose coverage levels were informed by the most recent National HIV Communication Survey [2].

For existing interventions, we assumed a feasible maximum coverage of 95% by 2018/19, apart from medical male circumcision (MMC) and HIV counselling and testing (HCT). For MMC, the model reached a maximum of 550,000 circumcisions per annum in 2018/19 given inherent assumptions about demand and need for MMC. For HCT, we chose an upper limit of 18 million tests per annum after consultation with the National Department of Health, after taking current programmatic constraints into consideration. For all interventions not already introduced into the South African HIV programme, we assumed a feasible maximum coverage of 70% by 2018/19 given likely programmatic constraints to scaling up further in the short term.

### B: Summary of unit costs by intervention

| Intervention                                          | Description                                                                                                                                         | Unit costs (ZAR 2015)                                                         |
|-------------------------------------------------------|-----------------------------------------------------------------------------------------------------------------------------------------------------|-------------------------------------------------------------------------------|
| Antiretroviral therapy (ART) under current guidelines | Increase ART coverage whilst maintaining current eligibility criteria (CD4<500 and PMTCT B+ (triple ART initiation for life in all pregnant women)) | R 3,665 per patient year (adults, 2014/5) <sup>1</sup>                        |
| Universal treatment                                   | Changing guidelines to allow for universal treatment (regardless of CD4 count) in addition to increasing ART coverage                               | R 3,412 per patient year (children, 2014/5)                                   |
| Adult medical male circumcision (MMC)                 | Only unmarried men are assumed to get circumcised as a result of programmes that promote MMC as an HIV prevention strategy                          | R 1,431 per circumcision                                                      |
| Early infant male circumcision (EIMC)                 | Circumcision of male infants in their first year of life                                                                                            | R 605.10 per circumcision                                                     |
| Condom availability                                   | This refers to distributing sufficient condoms to ensure that a specified proportion of sex acts will be protected                                  | R 0.42 per condom distributed                                                 |
| PrEP for female sex workers                           | Providing PrEP to sex workers only                                                                                                                  | R 3,287 per patient year (first year)<br>R 2,548 per patient year (follow-up) |

<sup>1</sup> Note that ART costs were calculated using the National ART Cost Model and vary over time.

| Intervention                                             | Description                                                                        | Unit costs (ZAR 2015)                                                         |
|----------------------------------------------------------|------------------------------------------------------------------------------------|-------------------------------------------------------------------------------|
| PrEP for young women                                     | Providing PrEP to young women aged 15-24 only                                      | R 3,105 per patient year (first year)<br>R 2,527 per patient year (follow-up) |
| Prevention of Mother To Child Transmission (PMTCT)       | ART uptake in pregnant women                                                       | R 3,665 per patient year (adults, 2014/5)                                     |
| Infant testing at birth                                  |                                                                                    | R 389.49 per test                                                             |
| Infant testing at 6 weeks                                |                                                                                    | R 369.11 per test                                                             |
| HIV counselling and testing (HCT) of general population  |                                                                                    | R 87.76 per test (negative)<br>R 97.01 per test (positive)                    |
| HCT of sex workers                                       | Dedicated HIV testing drives targeted at sex workers                               |                                                                               |
| HCT of adolescents                                       | Dedicated HIV testing drives targeted at adolescents                               | R 234.13 per test                                                             |
| Social and behaviour change (SBCC) mass media campaign 1 | Message of reducing multiple sexual partners and increasing testing in adolescents | R 9.78 per person reached                                                     |
| SBCC mass media campaign 2                               | Message of increasing condom usage and self-efficacy                               | R 5.00 per person reached                                                     |
| SBCC mass media campaign 3                               | Message of increasing HIV testing, condom usage, condom self-efficacy, and MMC     | R 2.74 per person reached                                                     |

## C: ICERs and rank order of interventions using the conventional league table method

Table 1: ICERs and rank order of interventions using the conventional league table method

| Intervention              | Total cost of intervention (2014 USD) | Incremental cost over baseline (2014 USD) | Life years saved over baseline | ICER (Cost/LYS) | Final rank |
|---------------------------|---------------------------------------|-------------------------------------------|--------------------------------|-----------------|------------|
| <b>Baseline</b>           | 52,533,337,028                        | -                                         | -                              | -               | -          |
| Condom availability       | 51,022,627,998                        | -1,490,373,244                            | 3,899,253                      | Cost saving     | 1          |
| Male medical circumcision | 52,369,215,443                        | -158,178,658                              | 1,372,940                      | Cost saving     | 1          |
| SBCC1                     | 52,597,007,390                        | 69,655,491                                | 1,381,088                      | 50              | 3          |
| ART (current guidelines)  | 52,783,255,201                        | 243,979,392                               | 2,614,314                      | 93              | 4          |
| PMTCT                     | 52,621,464,976                        | 85,861,680                                | 666,297                        | 129             | 5          |
| Universal treatment       | 54,386,572,548                        | 1,812,436,748                             | 9,940,779                      | 182             | 6          |
| Infant testing at 6 weeks | 52,579,122,663                        | 45,809,932                                | 220,444                        | 208             | 7          |
| HCT for sex workers       | 52,573,269,976                        | 39,772,123                                | 109,004                        | 365             | 8          |
| SBCC2                     | 52,582,120,264                        | 49,297,508                                | 86,165                         | 572             | 9          |
| SBCC3                     | 52,643,609,707                        | 110,906,185                               | 158,211                        | 701             | 10         |
| PrEP for sex workers      | 52,683,046,199                        | 149,079,539                               | 161,601                        | 923             | 11         |
| General population HCT    | 53,441,216,557                        | 909,747,251                               | 713,141                        | 1,276           | 12         |
| Infant testing at birth   | 53,084,042,007                        | 550,757,567                               | 408,193                        | 1,349           | 13         |
| HCT for adolescents       | 55,842,339,089                        | 3,308,036,903                             | 1,867,487                      | 1,771           | 14         |
| PrEP for young women      | 63,288,723,746                        | 10,699,314,344                            | 2,904,336                      | 3,684           | 15         |
| EIMC                      | 52,881,856,374                        | 348,517,497                               | 40                             | 8,712,937       | 16         |

1. Johnson LF. THEMBISA version 1.0: A model for evaluating the impact of HIV/AIDS in South Africa. Cape Town: Centre for Infectious Disease Epidemiology and Research, University of Cape Town; 2014.
2. Johnson S, Kincaid D, Figueroa ME, Delate R, Mahlasela L, Magni S. The Third National HIV Communication Survey, 2012. . Pretoria: JHHESA, Lovelife, Soul City, 2012.
